# Supplementary material for: Comprehensive Observational Study in a Large Cohort of Asthma Patients after Adding LAMA to ICS/LABA
Source: MDPI journal article supplement (doi:10.3390/ph16111609), 2023-11-14
Supplement: s1 [file s1]

# Comprehensive Observational Study in a Large Cohort of Asthma Patients after Adding LAMA to ICS/LABA

## SUPPLEMENTARY MATERIAL

**Table S1. Unit costs (€) for healthcare and non-healthcare resources.**

| Healthcare and non-healthcare resources   | Unit costs (€)      |
|-------------------------------------------|---------------------|
| <b>Medical visits</b>                     |                     |
| Primary care visit                        | 24.2                |
| Emergency visit                           | 122.8               |
| Hospitalizations (per day)                | 568.0               |
| Specialized care medical visit*           | 96.7                |
| <b>Complementary tests</b>                |                     |
| Laboratory tests                          | 33.8                |
| Conventional radiology                    | 29.8                |
| Computed tomography                       | 100.3               |
| Magnetic nuclear resonance                | 185.0               |
| Other diagnostic/therapeutic tests        | 49.2                |
| <b>Drugs</b>                              | <i>Retail price</i> |
| <b>Productivity loss (indirect costs)</b> |                     |
| Cost per day of sick leave                | 101.2               |

Sources: Sicras-Mainar et al., 2019[40] and National Statistics Institute[46]. \*Regarding the Pneumology, Allergology and Internal Medicine Departments.

**Table S2. Treatment persistence and deaths during the study period.**

|                                        | Study population<br>(N = 4740) |
|----------------------------------------|--------------------------------|
| <b>Treatment persistence</b>           |                                |
| <i>Duration of treatment, days</i>     |                                |
| Mean (SD)                              | 284.8 (111.2)                  |
| Median (P25 - P75)                     | 365 (203 – 365)                |
| <i>Treatment persistence, patients</i> |                                |
| 6 months                               | 3696 (78.0%)                   |
| 95% CI                                 | 76,8 – 79.2%                   |
| 12 months                              | 2663 (56.2%)                   |
| 95% CI                                 | 54.8 – 57.6%                   |
| Discontinuation after 12 months        | 2077 (43.8%)                   |
| <b>Deaths</b>                          |                                |
| <i>Percentage</i>                      |                                |
| 95% CI                                 | 186 (3.9%)<br>3.4 – 4.4%       |
| <i>Time to death, days</i>             |                                |
| Mean (SD)                              | 203.3 (93.6)                   |
| Median (P25 - P75)                     | 213 (127 – 278)                |

Values expressed as a percentage (N, %) or mean (SD). CI: confidence intervals; P: percentiles; SD: standard deviation.

**Table S3. Generalized linear model repeated measures.**

| <b>Contrasts intra-subject (dependent variables)</b>            | <b>SC (Tipo III)</b> | <b>F</b> | <b><i>p</i></b> |
|-----------------------------------------------------------------|----------------------|----------|-----------------|
| 1. Number of severe exacerbations (before/after LAMA treatment) | 95.220               | 571.551  | <0.001          |
| 2. Use of SABA (before/after LAMA treatment)                    | 9.809                | 31.857   | <0.001          |
| 3. Use of oral corticosteroids (before/after LAMA treatment)    | 5.596                | 11.643   | 0.001           |
| <b>Contrasts inter-groups (covariates)</b>                      | <b>SC (Tipo III)</b> | <b>F</b> | <b><i>p</i></b> |
| Age, years                                                      | 4.334                | 9.016    | 0.003           |
| Charlson index                                                  | 13.512               | 28.113   | <0.001          |
| Difference in costs before/after LAMA treatment, euros          | 20.696               | 43.059   | <0.001          |
| Diagnosis of COPD                                               | 0.303                | 1.329    | 0.249           |

Variables included according to the established entry order. SCs were estimated using a Type III (balanced model with no empty cells). COPD: chronic obstructive pulmonary disease; F: Snedecor's F distribution; LAMA: long-acting muscarinic antagonists; P: statistical significance SABA: short-acting beta agonists; SC: sum of squares.
